# Supplementary material for: Image analysis-based tumor infiltrating lymphocytes measurement predicts breast cancer pathologic complete response in SWOG S0800 neoadjuvant chemotherapy trial
Source: PubMed Central journal article supplement (PMC10182981; doi:10.1038/s41523-023-00535-0), 2023-05-13
Supplement: 41523_2023_535_MOESM1_ESM.pdf [file 41523_2023_535_MOESM1_ESM.pdf]

**Supplementary Table 1: Multivariable model of pCR including high/low easTILs%.**

|                   | Odds Ratio | Standard Error | Z     | P >  z | (95% CI)     |
|-------------------|------------|----------------|-------|--------|--------------|
| High/low easTILs% | 2.60       | 1.18           | 2.11  | 0.035  | 1.07 – 6.33  |
| Bev vs. control   | 2.61       | 1.18           | 2.13  | 0.033  | 1.08 – 6.31  |
| HR positive       | 0.53       | 0.25           | -1.33 | 0.185  | 0.21 – 1.35  |
| LABC vs. IBC      | 4.73       | 5.16           | 1.43  | 0.154  | 0.56 – 40.11 |

pCR = pathologic complete response; CI = confidence interval; Bev = bevacizumab; HR = hormone receptor; LABC = locally advanced breast cancer; IBC = inflammatory breast cancer. Statistical analysis performed using multivariable logistic regression.

**Supplementary Table 2: Multivariable model of pCR including easTILs% score.**

|                 | Odds Ratio | Standard Error | Z     | P >  z | (95% CI)     |
|-----------------|------------|----------------|-------|--------|--------------|
| easTILs% score  | 1.06       | 0.016          | 3.73  | 0.000  | 1.03 – 1.09  |
| Bev vs. control | 2.93       | 1.42           | 2.21  | 0.027  | 1.13 – 7.58  |
| HR positive     | 0.67       | 0.34           | -0.80 | 0.425  | 0.25 – 1.80  |
| LABC vs. IBC    | 4.20       | 4.71           | 1.28  | 0.201  | 0.47 – 37.89 |

pCR = pathologic complete response; CI = confidence interval; Bev = bevacizumab; HR = hormone receptor; LABC = locally advanced breast cancer; IBC = inflammatory breast cancer. Statistical analysis performed using multivariable logistic regression.
